# Supplementary material for: Are population‐based patient‐reported outcomes associated with overall survival in patients with advanced pancreatic cancer?
Source: PubMed Central journal article supplement (PMC6943146; doi:10.1002/cam4.2704), 2019-11-17

**Appendix Figure 1: Kaplan Meier Estimate of OS by Mild, Moderate and Severe Gradient of baseline composite ESAS scores**

**A**

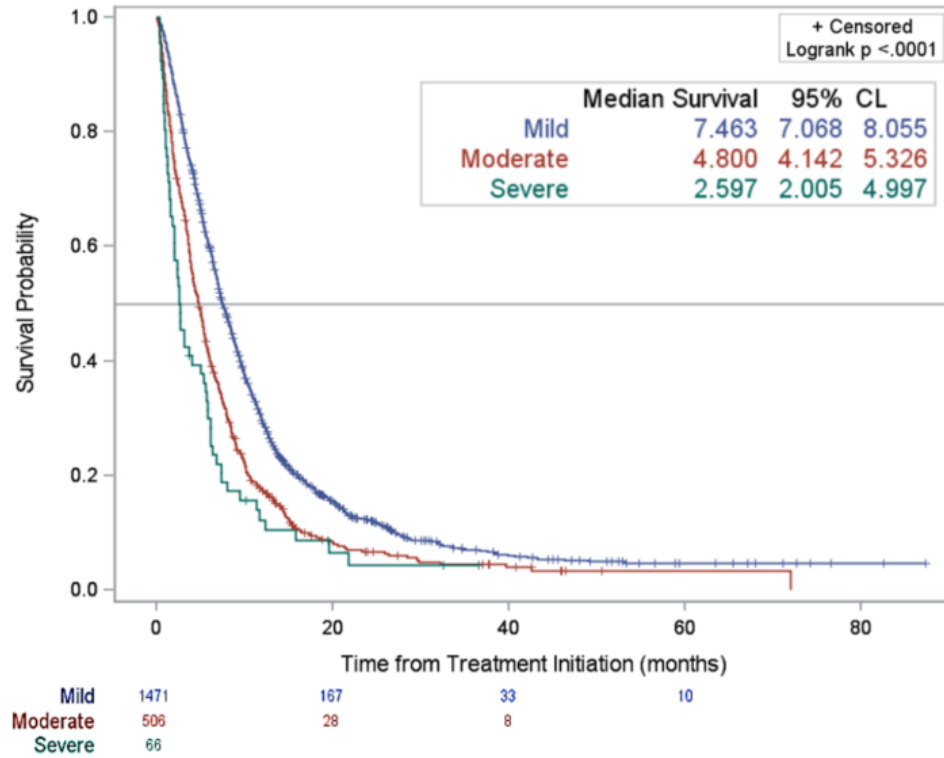

**B**

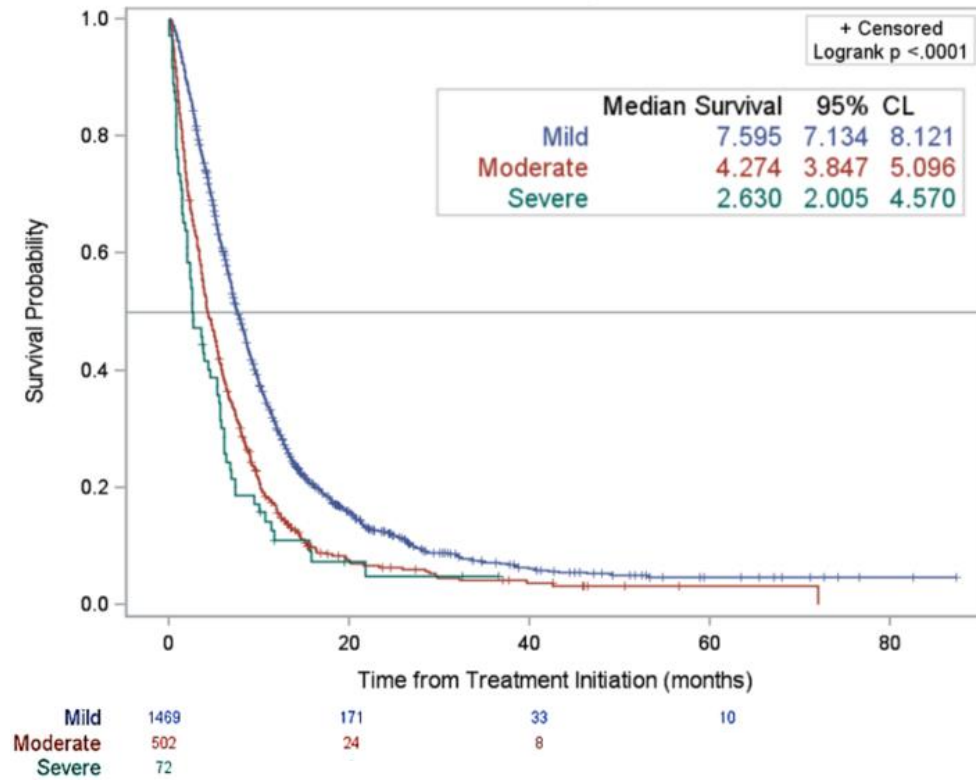

C

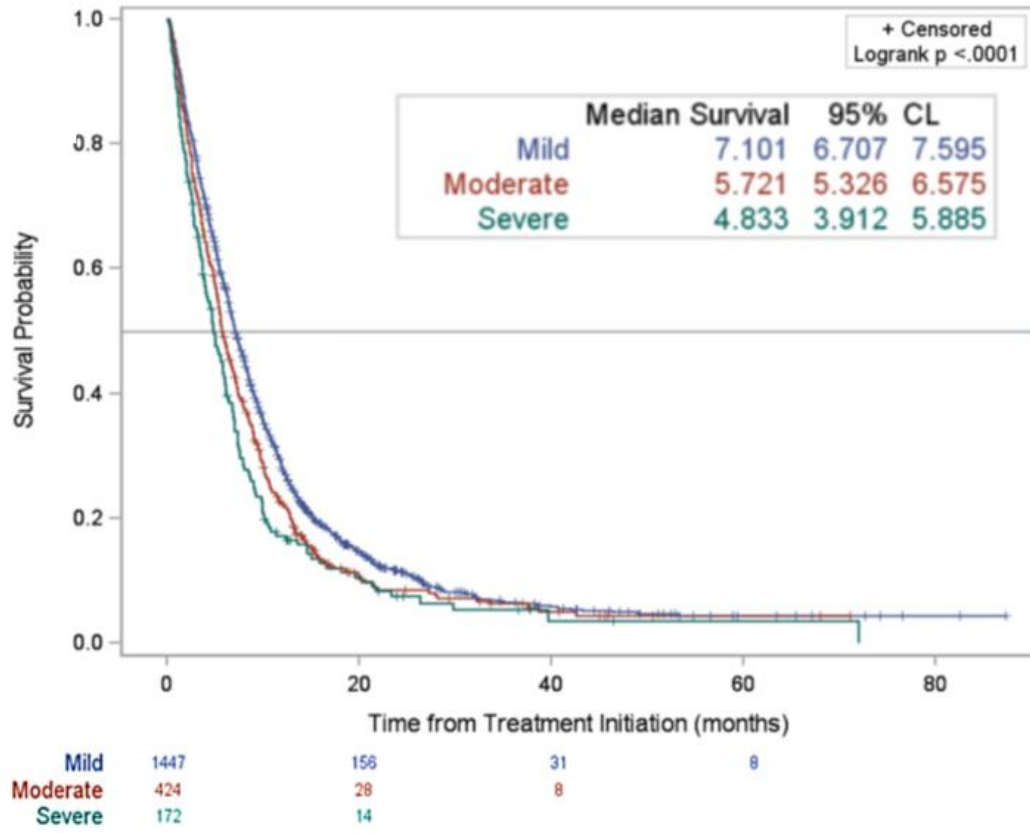

Supplement: CAM4-9-215-s001.pdf [file CAM4-9-215-s001.pdf]
